# Supplementary material for: Interaction of Purinergic P2X4 and P2X7 Receptor Subunits
Source: PubMed Central journal article supplement (PMC5702805; doi:10.3389/fphar.2017.00860), 2017-11-22
Supplement: Table_1.pdf [file Table_1.pdf]

**Supplementary Table 1 – Sequences of primers used for RT-PCR amplification and subcloning of the rP2X7 DNA**

| Construct number | Construct name | Primer number | Orientation | Primer sequence                                                   |
|------------------|----------------|---------------|-------------|-------------------------------------------------------------------|
| K-0887           | rP2X7          | O-0551        | forward     | 5' AAAG <b><u>GACGTC</u></b> GAGCCTGTCGCCATGCCCCGCTTGCTGTAGCTGGAA |
| K-0887           | rP2X7          | O-0552        | reverse     | 5' AAAT <b><u>TCTAGA</u></b> TAGTCAGTAGGGATACTTGAAGCCACTGTACTGCC  |

Construct and primer numbers refer to lab-internal documentation lists and are shown for eventual tracking purposes. AatII (GACGTC) and XbaI (TCTAGA) restriction sites used for directional cloning into the pNKS2 vector are bolded and underlined.

**Supplementary Table 2 – Sequences of primers used for in-frame ligation of the GFP coding sequence into the hGLYRA1 DNA 3' of the signal peptide**

| Construct number | Final construct name           | Primer number | Orientation | Primer sequence                                                                  |
|------------------|--------------------------------|---------------|-------------|----------------------------------------------------------------------------------|
| K-1555           | SP <sup>mut</sup> -hGLYRA1-His | O-1699        | forward     | 5' GAGGCTGAAGCTGCT <b><u>CATATG</u></b> GATATCA <b><u>AGCGCT</u></b> CCGCACCCAAG |
| K-1555           | SP <sup>mut</sup> -hGLYRA1-His | O-1700        | reverse     | 5' CTTGGGTGCGG <b><u>AGCGCT</u></b> TGATATC <b><u>CATATG</u></b> AGCAGCTTCAGCCTC |
| K-1556           | SP-GFP-hGLYRA1-His             | O-1701        | forward     | 5' AAAAA <b><u>CATATG</u></b> GTGAGCAAGGGCGAGGAG                                 |
| K-1556           | SP-GFP-hGLYRA1-His             | O-1702        | reverse     | 5' AAAAA <b><u>AGCGCT</u></b> TGTACAGCTCGTCCATGCCGA                              |

Construct and primer numbers refer to lab-internal documentation lists and are shown for eventual tracking purposes. NdeI (CATATG) and Eco47III (AGCGCT) restriction sites (bolded and underlined) were first inserted by QuikChange mutagenesis and then used for the directional subcloning of the PCR-amplified GFP coding sequence.

**Supplementary Table 3 – Sequences of megaprimers used in this study**

| Construct number | Final construct name                           | Primer number | Orientation | Megaprimer sequence                                                    |
|------------------|------------------------------------------------|---------------|-------------|------------------------------------------------------------------------|
| K-6530           | hP2X4-GFP                                      | O-7149        | forward     | 5' GCAGGGTCTTGCTAGTGAGCTGGACCAG <b>GTGAGCAAGGGCGAGGAG</b>              |
| K-6530           | hP2X4-GFP                                      | O-7150        | reverse     | 5' GGCGCGCCCGGAATTCCTCA <b>CTTGTACAGCTCGTCCATGCC</b>                   |
| K-6531           | hP2X4-RFP                                      | O-7697        | forward     | 5' GCAGGGTCTTGCTAGTGAGCTGGACCAG <b>ATGGTGTCTAAGGGCGAAGAGC</b>          |
| K-6531           | hP2X4-RFP                                      | O-7618        | reverse     | 5' GGCGCGCCCGGAATTCCTCA <b>ATTAAGTTTGTGCCCCAGTTTGC</b>                 |
| K-6926           | hP2X4-GFP-RFP                                  | O-9216        | forward     | 5' <b>GATCACTCTCGGCATGGACGAGCTGTACAAGATGGTGTCTAAGGGCGAAGAGC</b>        |
| K-6926           | hP2X4-GFP-RFP                                  | O-9278        | reverse     | 5' CCTCGATGTTGTGGCGATCTTGAAGTTCA <b>ATTAAGTTTGTGCCCCAGTTTGC</b>        |
| K-6776           | <sup>122</sup> GFP-hP2X4                       | O-9083        | forward     | 5' CCTGTGCCCCGAGATTCCAGATGCG <b>GTGAGCAAGGGCGAGGAGC</b>                |
| K-6776           | <sup>122</sup> GFP-hP2X4                       | O-9082        | reverse     | 5' GCAGTACAGCTGGCATCTGATTTACACACAGTGGT <b>CTTGTACAGCTCGTCCATGCC</b>    |
| K-6925           | <sup>122</sup> RFP-hP2X4                       | O-9276        | forward     | 5' CCTGTGCCCCGAGATTCCAGATGCG <b>ATGGTGTCTAAGGGCGAAGAGC</b>             |
| K-6925           | <sup>122</sup> RFP-hP2X4                       | O-9277        | reverse     | 5' GCAGTACAGCTGGCATCTGATTTACACACAGTGGT <b>ATTAAGTTTGTGCCCCAGTTTGC</b>  |
| K-7080           | rP2X4-GFP                                      | O-9464        | forward     | 5' GCAGGGTCTTTTCGGGGGAGATGAACCAG <b>ATGGTGAGCAAGGGCGAGG</b>            |
| K-7080           | rP2X4-GFP                                      | O-9465        | reverse     | 5' GCGCCCGGAATTCTAGAGGCGTCA <b>CTTGTACAGCTCGTCCATGCC</b>               |
| K-7081           | rP2X4-RFP                                      | O-9466        | forward     | 5' GCAGGGTCTTTTCGGGGGAGATGAACCAG <b>ATGGTGTCTAAGGGCGAAGAGC</b>         |
| K-7081           | rP2X4-RFP                                      | O-9467        | reverse     | 5' GCGCCCGGAATTCTAGAGGCGTCA <b>ATTAAGTTTGTGCCCCAGTTTGC</b>             |
| K-7079           | <sup>122</sup> RFP-rP2X4                       | O-9462        | forward     | 5' CAGACACAGAGCACCTGTCCAGAGATTCCCTGATAAG <b>ATGGTGTCTAAGGGCGAAGAGC</b> |
| K-7079           | <sup>122</sup> RFP-rP2X4                       | O-9463        | reverse     | 5' GTGCAGTCGGCGTCTGAATTACAAATGCTGGT <b>ATTAAGTTTGTGCCCCAGTTTGC</b>     |
| K-7183           | <sup>122.GAGA</sup> GFP <sup>AGAG</sup> -rP2X4 | O-9578        | forward     | 5' CTGTCCAGAGATTCTGATAAGGGAGCTGGAGCT <b>ATGGTGAGCAAGGGCGAGG</b>        |
| K-7183           | <sup>122.GAGA</sup> GFP <sup>AGAG</sup> -rP2X4 | O-9579        | reverse     | 5' GTCTGAATTACAAATGCTGGT <b>TCCAGCTCCAGCCTTGTACAGCTCGTCCATGCC</b>      |
| K-7081           | <sup>122.GAGA</sup> RFP <sup>AGAG</sup> -rP2X4 | O-9470        | forward     | 5' CTGTCCAGAGATTCTGATAAGGGAGCTGGAGCT <b>ATGGTGTCTAAGGGCGAAGAGC</b>     |
| K-7081           | <sup>122.GAGA</sup> RFP <sup>AGAG</sup> -rP2X4 | O-9471        | reverse     | 5' GTCTGAATTACAAATGCTGGT <b>TCCAGCTCCAGCCTTAAGTTTGTGCCCCAGTTTGC</b>    |
| K-6893           | hP2X7-GFP                                      | O-9214        | forward     | 5' GTGAAGGGCAGTACAGTGGCTTCAAGAGTCTTAC <b>ATGGTGAGCAAGGGCGAGG</b>       |
| K-6893           | hP2X7-GFP                                      | O-9215        | reverse     | 5' CCGGGATCCTCTAGAGCCTGGCTTCA <b>CTTGTACAGCTCGTCCATGCC</b>             |
| K-6892           | hP2X7-RFP                                      | O-9212        | forward     | 5' GAAGGGCAGTACAGTGGCTTCAAGAGTCTTAC <b>ATGGTGTCTAAGGGCGAAGAGC</b>      |
| K-6892           | hP2X7-RFP                                      | O-9213        | reverse     | 5' CGGGATCCTCTAGAGCCTGGCTTCA <b>ATTAAGTTTGTGCCCCAGTTTGC</b>            |
| K-6894           | hP2X7-GFP-RFP                                  | O-9216        | forward     | 5' <b>GATCACTCTCGGCATGGACGAGCTGTACAAGATGGTGTCTAAGGGCGAAGAGC</b>        |

|        |                                                |        |         |                                                                        |
|--------|------------------------------------------------|--------|---------|------------------------------------------------------------------------|
| K-6894 | hP2X7-GFP-RFP                                  | O-9217 | reverse | 5' CCGGGGATCCTCTAGAGCCTGGCTTCA <b>ATTAAGTTTGTGCCCCAGTTGC</b>           |
| K-6885 | hP2X7 <sup>1-408</sup> -GFP                    | O-9203 | forward | 5' CATTAAAGTACGTGTCCTTTGTGGATGAATCCCAC <b>ATGGTGAGCAAGGGCGAGG</b>      |
| K-6885 | hP2X7 <sup>1-408</sup> -GFP                    | O-9204 | reverse | 5' CGGTACGTACCCGGGGATCCTCTAGACTCA <b>CTTGACAGCTCGTCCATGCC</b>          |
| K-6906 | hP2X7 <sup>1-408</sup> -RFP                    | O-9238 | forward | 5' CATTAAAGTACGTGTCCTTTGTGGATGAATCCCAC <b>ATGGTGTCTAAGGGCGAAGAGC</b>   |
| K-6906 | hP2X7 <sup>1-408</sup> -RFP                    | O-9239 | reverse | 5' CGGTACGTACCCGGGGATCCTCTAGACTCA <b>ATTAAGTTTGTGCCCCAGTTGC</b>        |
| K-6945 | rP2X7-GFP                                      | O-9281 | forward | 5' CAGGGGCAGTACTCTGGCTTCAAGTATCCCTAC <b>ATGGTGAGCAAGGGCGAGG</b>        |
| K-6945 | rP2X7-GFP                                      | O-9282 | reverse | 5' CGGTACGTACCCGGGGATCCTCTAGATAGTCA <b>CTTGACAGCTCGTCCATGCCG</b>       |
| K-6946 | rP2X7-RFP                                      | O-9283 | forward | 5' CAGGGGCAGTACTCTGGCTTCAAGTATCCCTAC <b>ATGGTGTCTAAGGGCGAAGAGC</b>     |
| K-6946 | rP2X7-RFP                                      | O-9284 | reverse | 5' CGGTACGTACCCGGGGATCCTCTAGATAGTCA <b>ATTAAGTTTGTGCCCCAGTTGC</b>      |
| K-7016 | <sup>122.GAGA</sup> GFP <sup>AGAG</sup> -rP2X7 | O-9370 | forward | 5' GAGTATCCCAGCCG <b>GGAGCTGGAGCTATGGTGAGCAAGGGCGAGG</b>               |
| K-7016 | <sup>122.GAGA</sup> GFP <sup>AGAG</sup> -rP2X7 | O-9371 | reverse | 5' CAGAATGGCACTGTTTACCT <b>CCAGCTCCAGCCTTGACAGCTCGTCCATGCC</b>         |
| K-5710 | GluCl-GFP                                      | O-7724 | forward | 5' GGACATCACCACCATCACCATCACCAT <b>ATGGTGAGCAAGGGCGAG</b>               |
| K-5710 | GluCl-GFP                                      | O-7723 | reverse | 5' CACCACTTTGTACAAGAAAGCTGGGTTCA <b>CTTGACAGCTCGTCCATGCC</b>           |
| K-7181 | hTrpV2-GFP                                     | O-9574 | forward | 5' GTGCCCCTCCAGCTCCTCCAGTCCAAC <b>ATGGTGAGCAAGGGCGAGG</b>              |
| K-7181 | hTrpV2-GFP                                     | O-9575 | reverse | 5' CGATATCACCACCTTTGTACAAGAAAGCTGGGTCTCTCA <b>CTTGACAGCTCGTCCATGCC</b> |

Construct and primer numbers refer to lab-internal documentation lists and are shown for eventual tracking purposes. Nucleotide sequences that align to GFP, RFP and linker are colored green, red and blue, respectively.
